# Supplementary material
Source: PubMed Central journal article supplement (PMC3015007)
Supplement: NIHMS238293-supplement-1.pdf [file NIHMS238293-supplement-1.pdf]

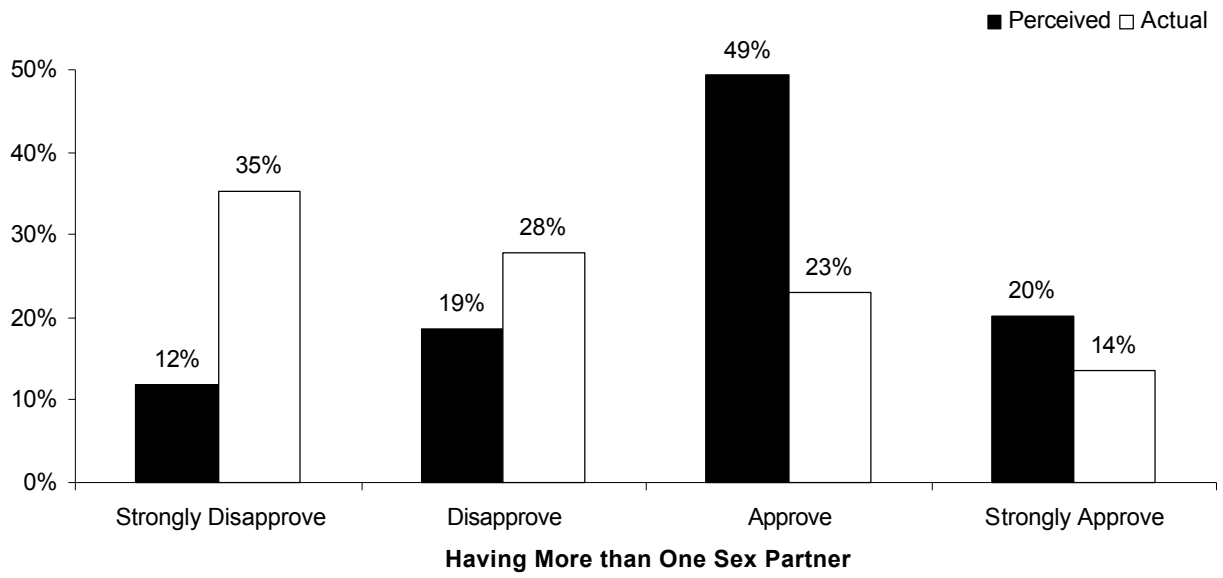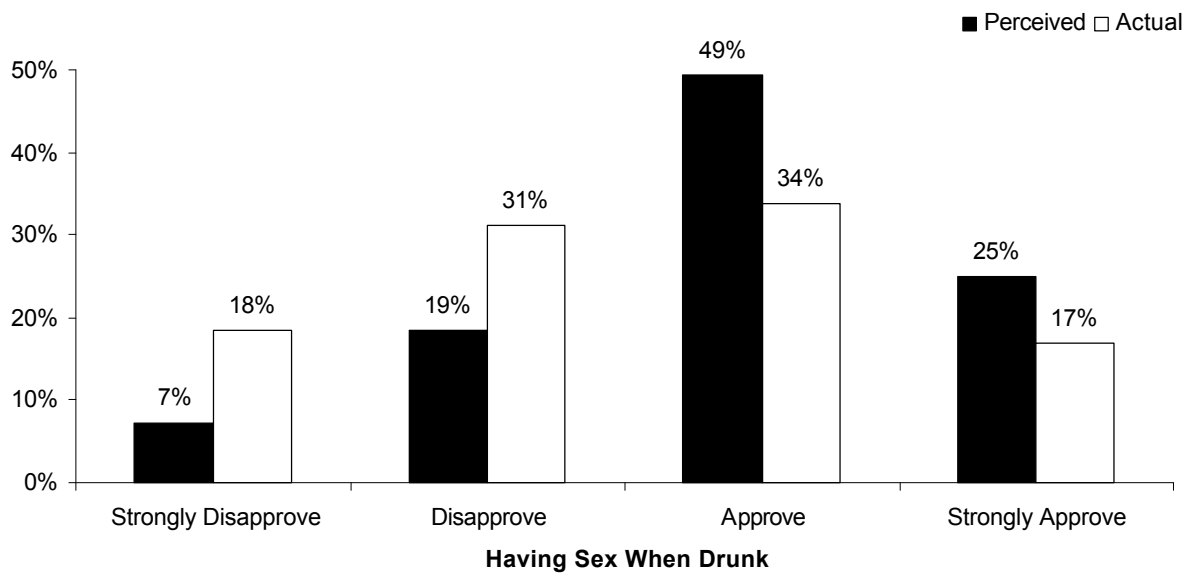

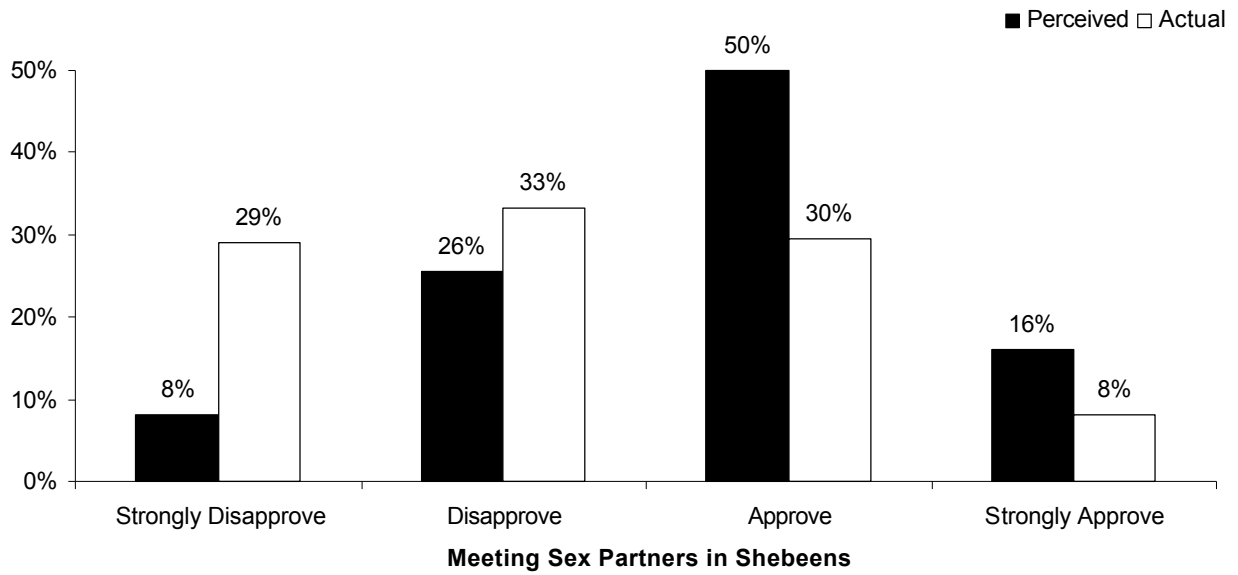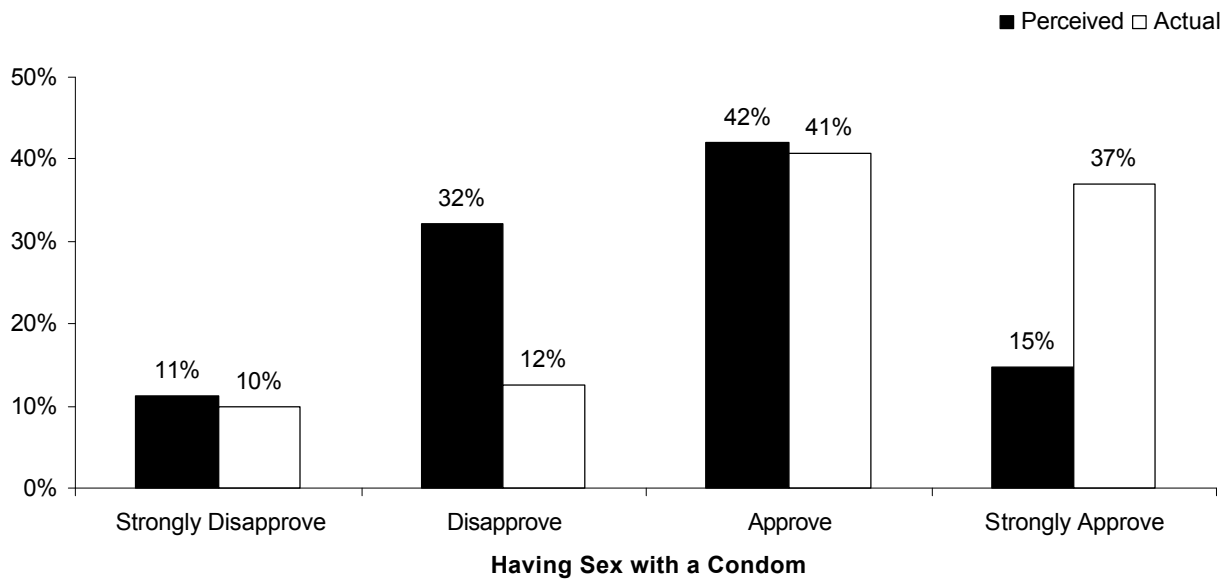

*Electronic Supplemental Figure.* Men’s perceived and self-reported approval ratings for having more than one sex partner (Panel A), having sex when drunk (Panel B), meeting sex partners in shebeens (Panel C), and having sex with a condom (Panel D)
